# Supplementary material for: Conditional Analysis Cakewalk
Source: bioRxiv or medRxiv preprint supplement (doi:10.1101/2020.02.14.947978), 2020-02-14
Supplement: Supplementary file [file media-1.pdf]

Enter the line number of the desired variant to select as the reference variant (columns are SNP, p-value, beta):

|    |             |            |       |
|----|-------------|------------|-------|
| 1  | rs141820146 | 1.498e-198 | 175.2 |
| 2  | rs142444132 | 1.498e-198 | 175.2 |
| 3  | rs17248769  | 1.498e-198 | 175.2 |
| 4  | rs17248776  | 1.498e-198 | 175.2 |
| 5  | rs17248783  | 1.498e-198 | 175.2 |
| 6  | rs2228671   | 1.498e-198 | 175.2 |
| 7  | rs73015033  | 1.498e-198 | 175.2 |
| 8  | rs73015034  | 1.498e-198 | 175.2 |
| 9  | rs74857287  | 1.498e-198 | 175.2 |
| 10 | rs117423069 | 2.333e-187 | 173.2 |
| 11 | rs17242395  | 2.333e-187 | 173.2 |

**Supplementary Figure 1.** Sample of output when choosing to manually select reference variant.

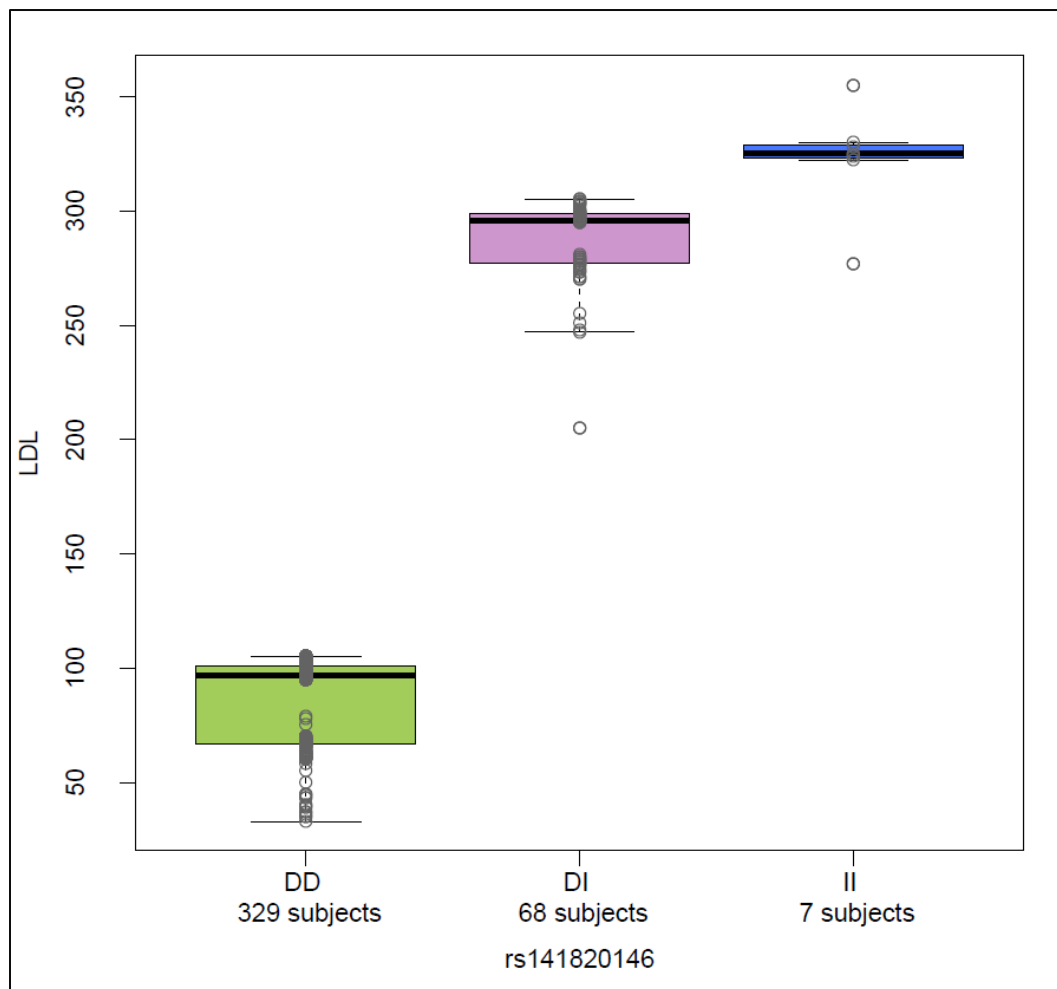

**Supplementary Figure 2.** Boxplot of LDL levels based on genotype of top variant from the first iteration of the Conditional Analysis Cakewalk on simulated data.

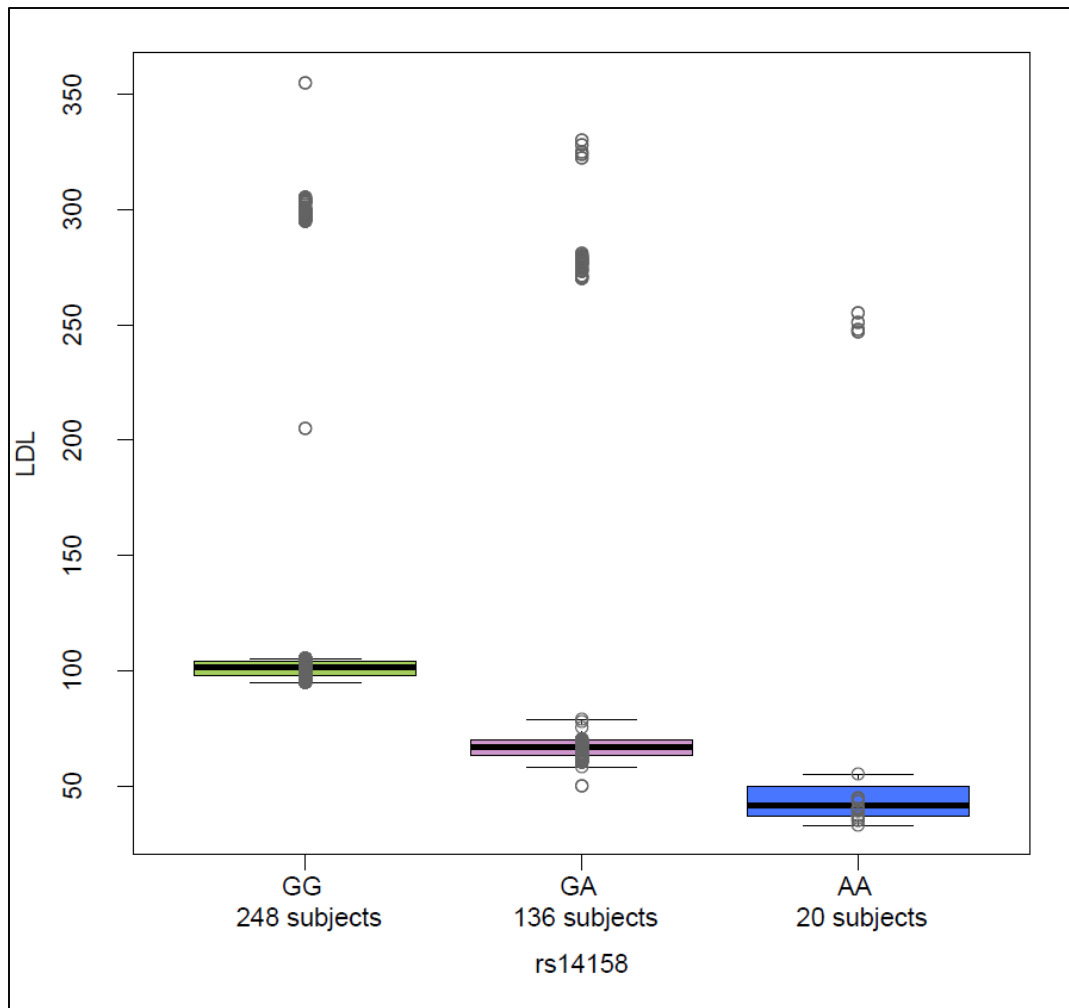

**Supplementary Figure 3.** Boxplot of LDL levels based on genotype of top variant from second iteration of Conditional Analysis Cakewalk on simulated data.

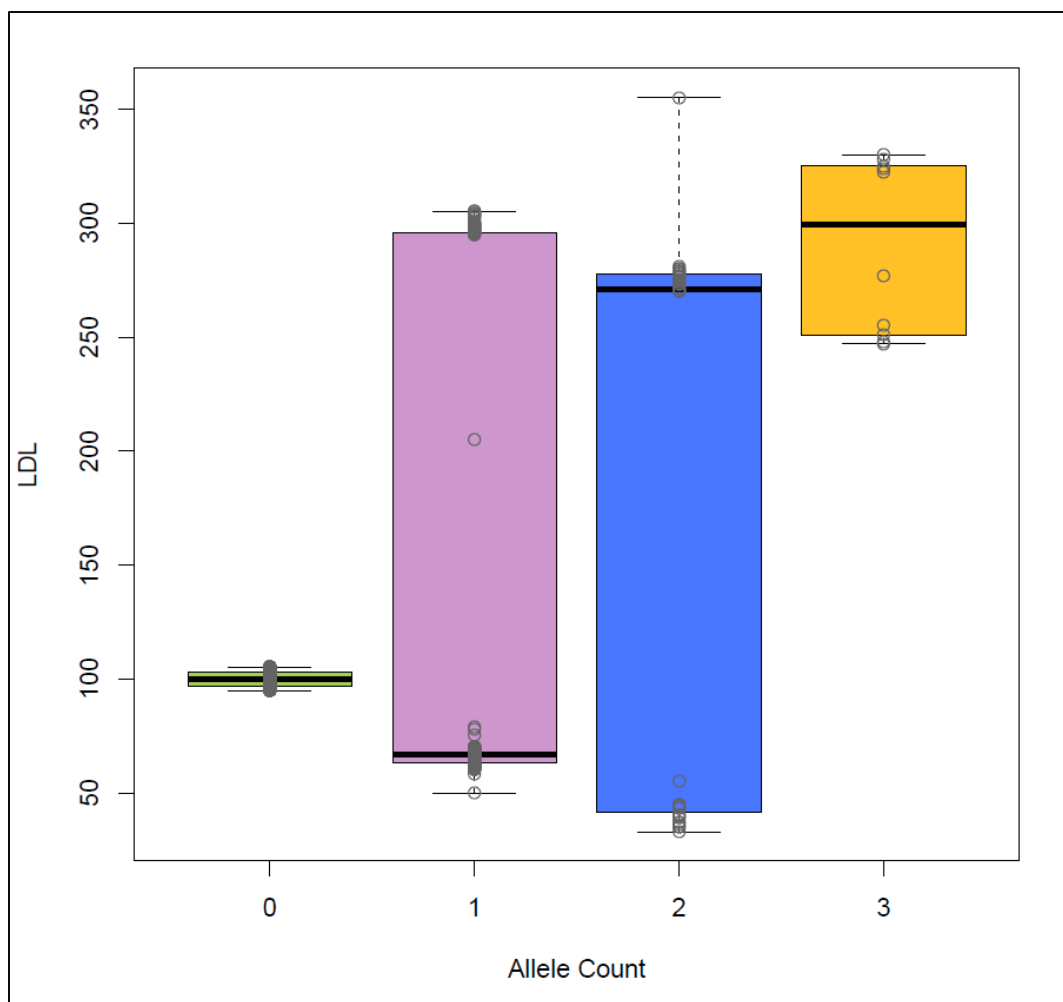

**Supplementary Figure 4.** Boxplot of LDL levels based on allele count of top variants from all iterations of the Conditional Analysis Cakewalk on simulated data.

| SNPNAME                      | CHR:POS        | PVALUE    | BETA  | LOCUSZOOM                 | BOXPLOT       |
|------------------------------|----------------|-----------|-------|---------------------------|---------------|
| rs141820146                  | chr19:11209757 | 1.50E-198 | 175.2 | LZ_LDL.chr19:11209757.pdf | LDL.test1.pdf |
| rs14158                      | chr19:11242044 | 1.90E-67  | -32.9 | LZ_LDL.chr19:11242044.pdf | LDL.test2.pdf |
| Statistics for final boxplot |                |           |       |                           |               |
| Allele_count                 | Subject_count  |           |       |                           |               |
| 0                            | 205            |           |       |                           |               |
| 1                            | 150            |           |       |                           |               |
| 2                            | 39             |           |       |                           |               |
| 3                            | 10             |           |       |                           |               |

**Supplementary Figure 5.** Contents of output file, TOP\_SNPS.csv, containing data from each iteration of the Conditional Analysis Cakewalk on simulated data and statistics for the final boxplot.
